# Supplementary material for: Extracellular vesicles enriched in connexin 43 promote a senescent phenotype in bone and synovial cells contributing to osteoarthritis progression
Source: PubMed Central journal article supplement (PMC9355945; doi:10.1038/s41419-022-05089-w), 2022-08-05
Supplement: 41419_2022_5089_MOESM1_ESM.pdf [file 41419_2022_5089_MOESM1_ESM.pdf]

## **Data Availability Statement**

The data that support the findings of this study are available from the corresponding authors upon reasonable request.
